# Supplementary material for: Grape pomace as a biosorbent for fluoride removal from groundwater
Source: Royal Society of Chemistry journal article supplement (doi:10.1039/c9ra00109c), 2019-01-01

## Supplementary Informations

**Fig.1 The calibration curve for the linear relationship between the standard concentration of fluoride ion and the electrode potential:**

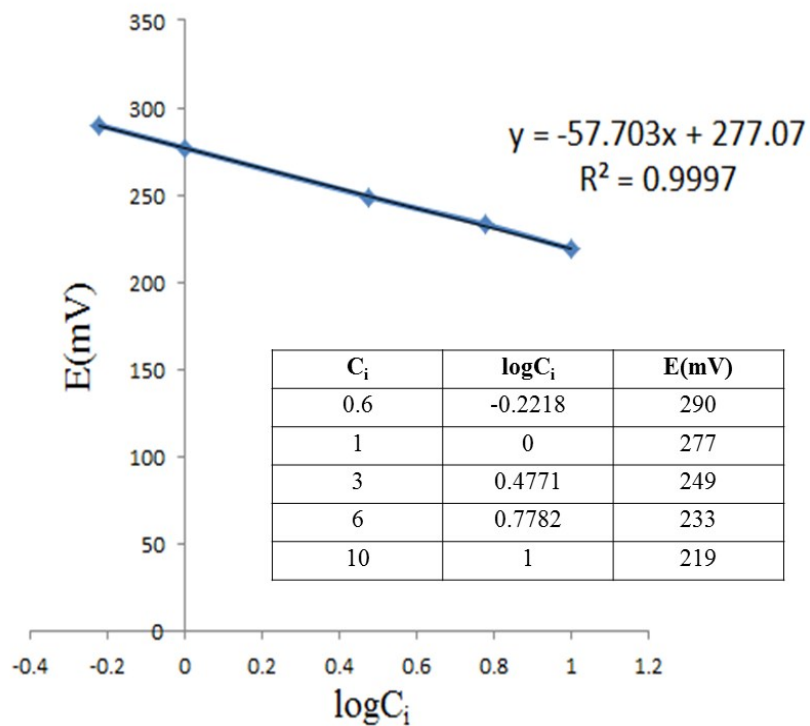

**Fig.2 Zeta potential of the Zr-GP gel at different pH values**

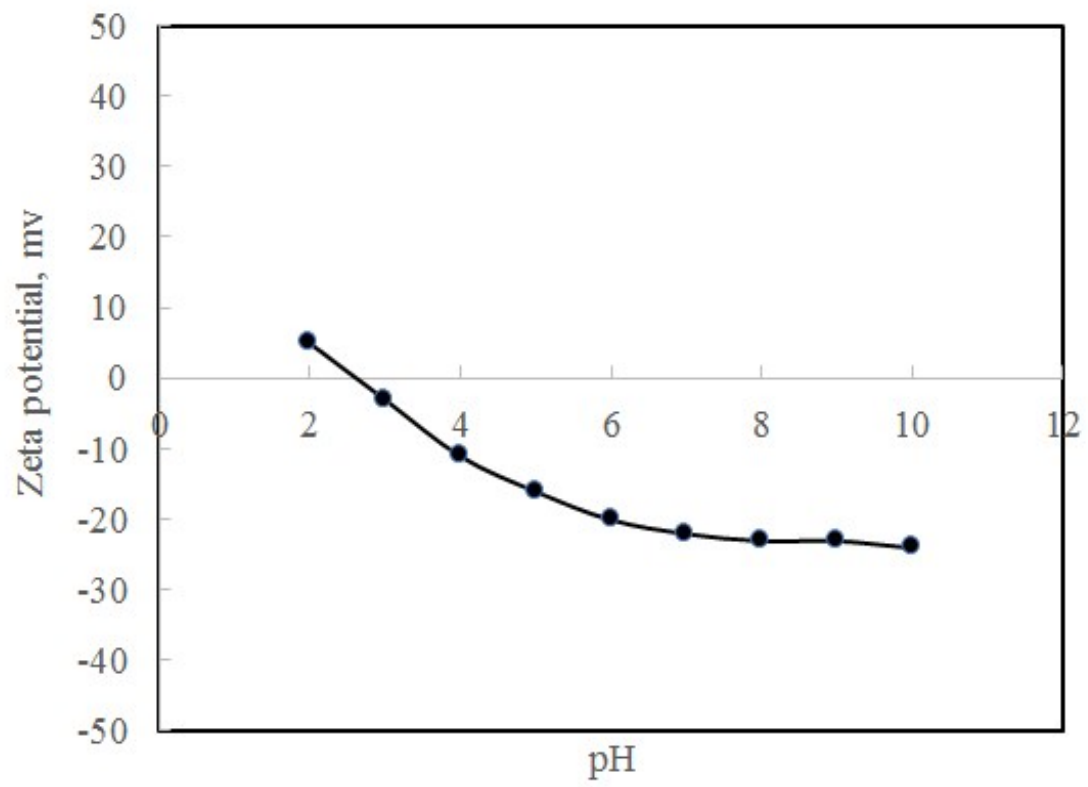

Supplement: c9ra00109c1.pdf [file c9ra00109c1.pdf]
